# Supplementary material
Source: bioRxiv or medRxiv preprint supplement (https://www.biorxiv.org/highwire/filestream/107638/field_highwire_adjunct_files/0/355495-1.pdf)
Supplement: Supplementary file [file 355495-1.pdf]

**Figure S1**

**A**

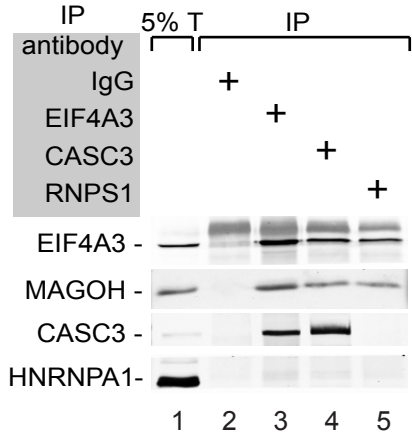

**B**

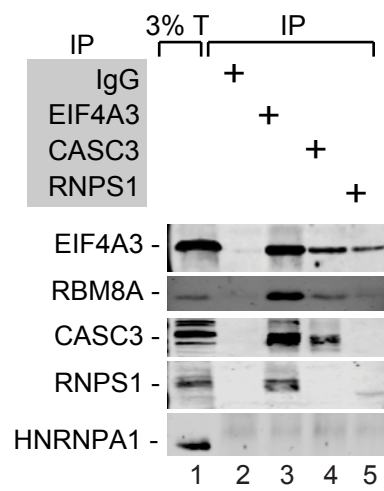

**C**

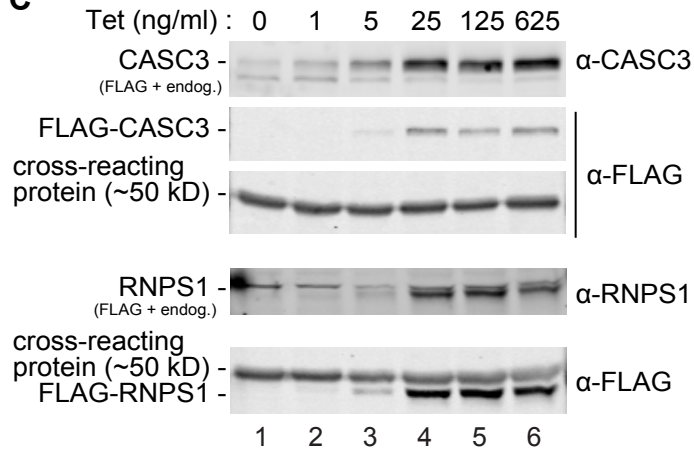

**D**

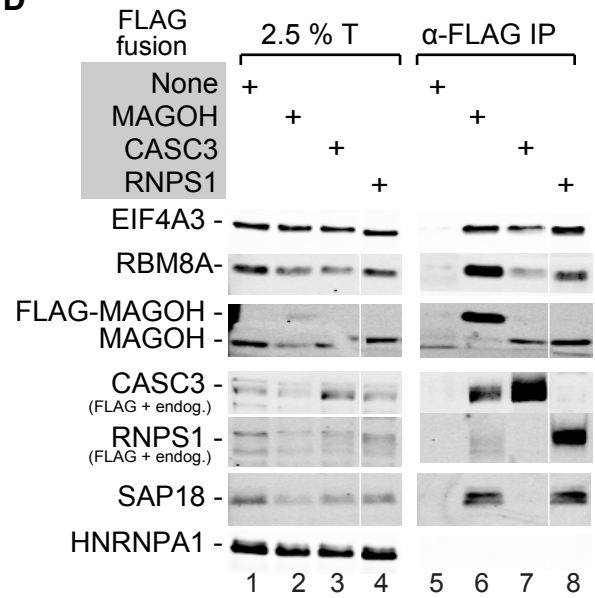

**E**

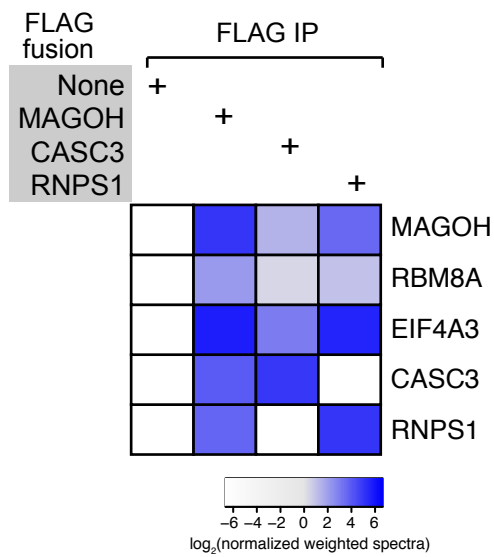

**Figure S1. (related to Figure 1)**

- (A) Alternate EJCs in P19 cells. Western blots showing proteins on the left in P19 total cell extract (T, lane 1) or the immuno-precipitates (IP, lanes 2-5) using the antibodies listed on the top.
- (B) Alternate EJCs in HeLa cells as in (A).
- (C) Tetracycline (Tet)-induction of FLAG-tagged CASC3 and RNPS1. Western blots showing Tet-induced expression of FLAG-fusion proteins in FLP-In TREx Tet-on HEK293 cell lines. Tet concentrations are on the top, proteins detected are on the left and antibodies used for westerns are on the right.
- (D) Tagged proteins assemble into alternate EJCs. Western blots showing proteins on the left in TE or FLAG IPs of FLAG-fusion proteins expressed in HEK293 cells at near-endogenous levels.
- (E) Alternate EJC proteomic analysis (replicate 2). Heatmap showing enrichment of proteins on the right in FLAG-EJC protein IP proteomic analysis (indicated on the top).

**Figure S2**

**A**

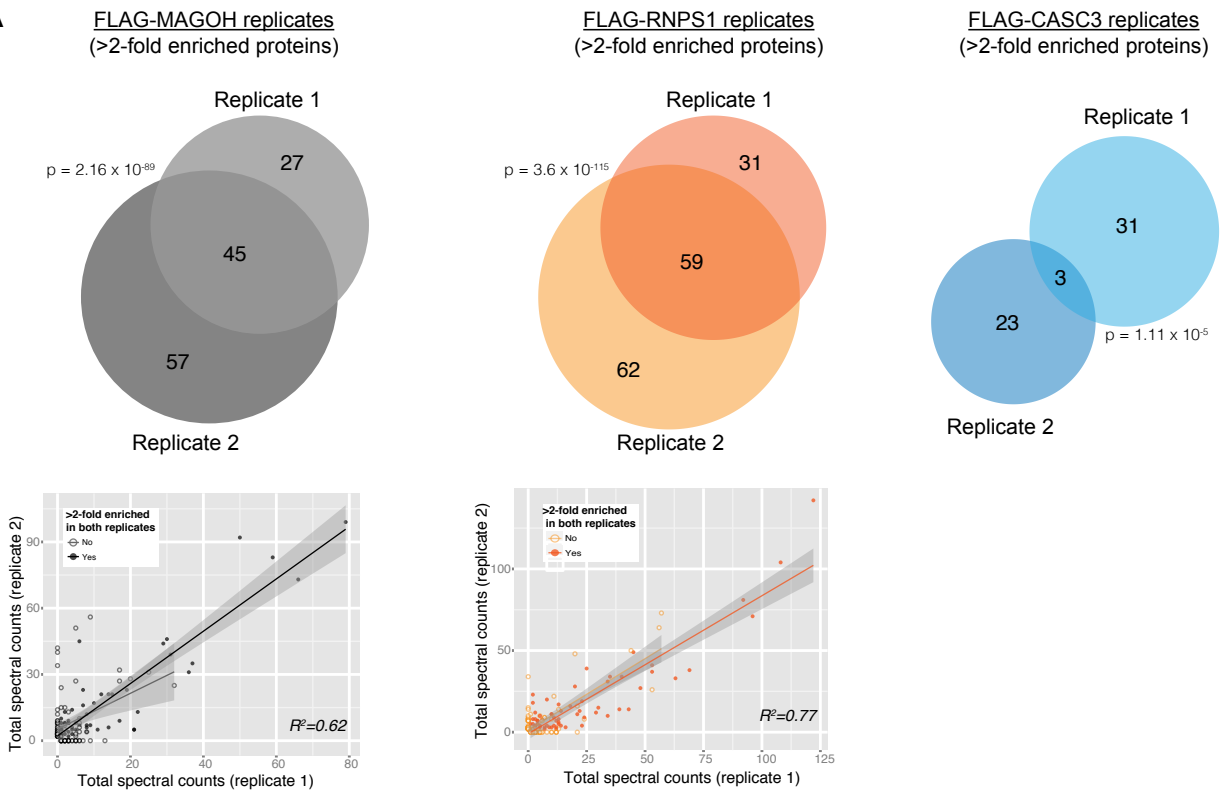

**B**

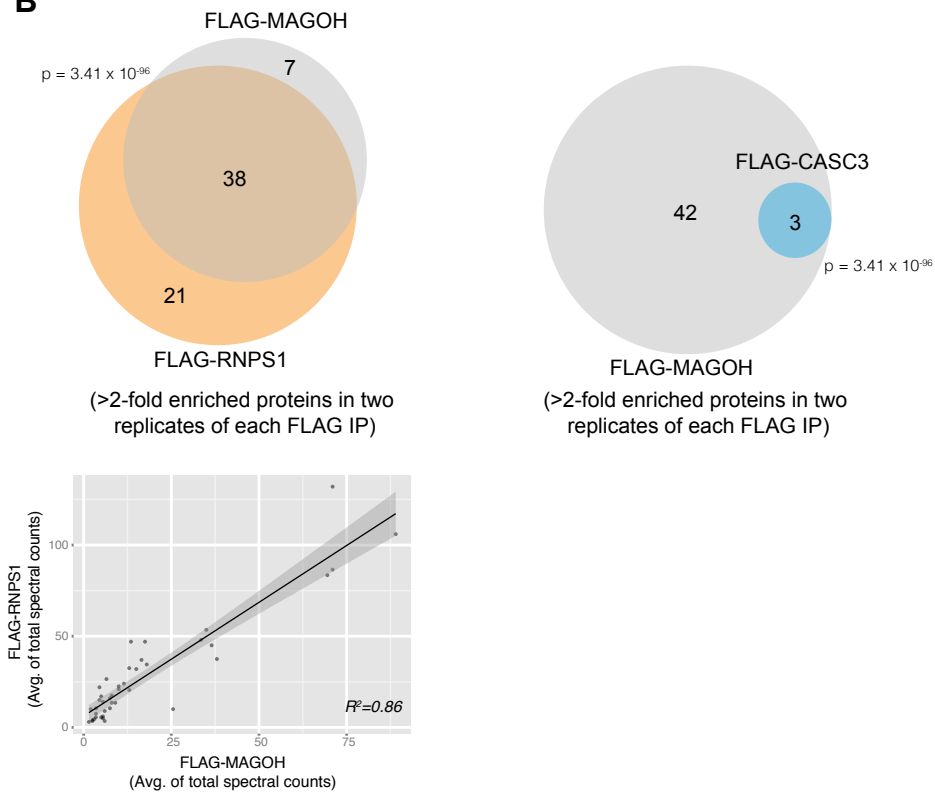

**Figure S2. (related to Figure 2)**

- (A) Comparison between the two biological replicates of each FLAG-EJC mass spec samples. Overlap between >2-fold enriched proteins in the two biological replicates of proteomics samples of FLAG-EJC proteins indicated on the top. Hypergeometric test p-values are shown next to each venn diagram. For FLAG-MAGOH and FLAG-RNPS1 replicates, scatter plots compare total spectral counts for proteins detected in the two biological replicates. The linear fits for proteins enriched less or more than 2-fold are shown as indicated in the legend. Spearman correlation coefficient for >2-fold enriched proteins in each sample is shown.
- (B) Comparisons as in (A) between the reproducibly enriched proteins in FLAG-MAGOH with those enriched in both replicates of FLAG-RNPS1 (left) and FLAG-CASC3 (right).

**Figure S3**

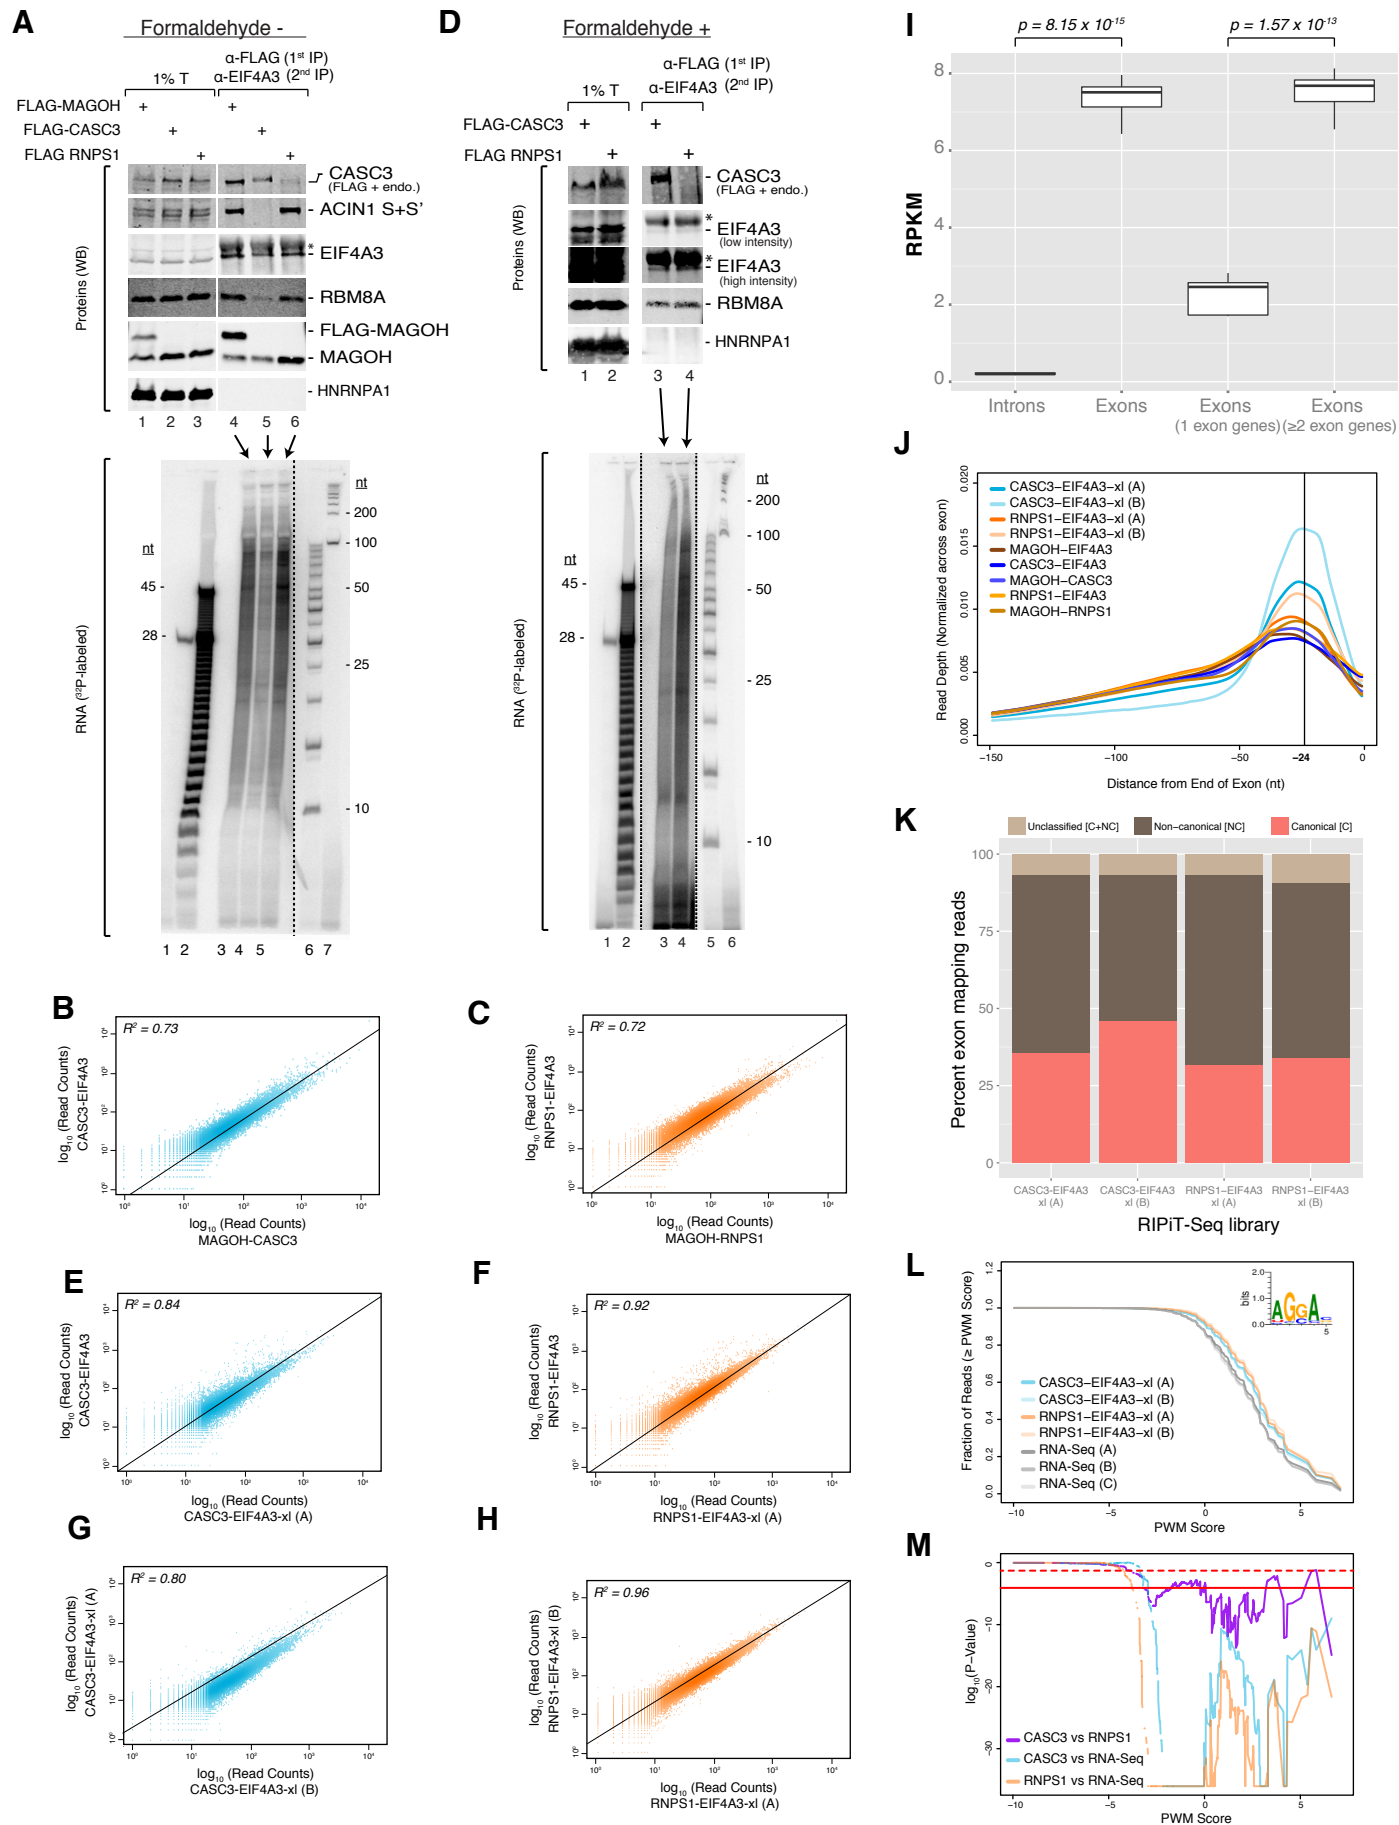

**Figure S3. (related to Figure 3)**

- (A) Proteins and RNAs enriched in native alternate EJC RIPiTs. Top: Western blots with proteins indicated on the right in TE or RIPiT elutions. Bottom: Autoradiogram of end labeled RNAs from RIPiT elutions as well as size-markers (indicated on either side). The asterisk (\*) indicates detection of IgG heavy chain.
- (B) Comparison between native CASC3-EJC RIPiT-Seq samples [FLAG-MAGOH:CASC3 (x-axis) versus FLAG-CASC3:EIF4A3 (y-axis)]. Scatter plot comparing read counts for canonical transcripts for each known gene in GRChg38 (represented by each dot). A linear fit and Spearman correlation coefficient are also shown.
- (C) Comparison between native RNPS1-EJC RIPiT-Seq samples [FLAG-MAGOH:RNPS1 (x-axis) versus FLAG-RNPS1:EIF4A3 (y-axis)] as in (C).
- (D) Proteins and RNAs enriched in formaldehyde-crosslinked alternate EJC RIPiTs as in (A).
- (E) Comparison as in (C) between native and formaldehyde-crosslinked CASC3-EJC RIPiT-Seq samples [FLAG-CASC3:EIF4A3, formaldehyde-crosslinked (xl), replicate A (x-axis) versus native FLAG-CASC3:EIF4A3 (y-axis)].
- (F) Comparison as in (C) between native and formaldehyde-crosslinked RNPS1-EJC RIPiT-Seq samples [FLAG-RNPS1:EIF4A3, formaldehyde-crosslinked (xl), replicate A (x-axis) versus native FLAG-RNPS1:EIF4A3 (y-axis)].
- (G) Comparison as in (C) between two replicates of the formaldehyde-crosslinked CASC3-EJC RIPiT-Seq samples [FLAG-CASC3:EIF4A3-xl, replicate B (x-axis) versus FLAG-CASC3:EIF4A3-xl, replicate A (y-axis)].
- (H) Comparison as in (C) between two replicates of the formaldehyde-crosslinked RNPS1-EJC RIPiT-Seq samples [FLAG-RNPS1:EIF4A3-xl, replicate B (x-axis) versus FLAG-RNPS1:EIF4A3-xl, replicate A (y-axis)].
- (I) Normalized read densities in alternate EJC footprint libraries in the genomic region indicated at the bottom. Each box plot comprises values from all eight RIPiT-Seq datasets listed in Table S2. Top: p-values (Wilcoxon rank sum test).
- (J) Meta-exon plots showing read depth in different RIPiT-Seq or RNA-Seq libraries (top left corner) in the 150 nucleotides (nt) from the exon 3' end.

- (K) Distribution of exon mapping reads among the exonic regions indicated on top in the RIPiT-Seq libraries (bottom).
- (L) Cumulative distribution function plots showing frequency of reads in the indicated samples with the highest score for match to PWM for SRSF9 motif (inset, top right). Bottom left: sample identity. The SRSF9 motif shown in the inset is from (Paradis et al., 2007).
- (M) A negative binomial based assessment of significance of differences in SRSF9 motif PWM scores in (L) between reads from samples in the legend on the bottom left. Horizontal dotted red line:  $p=0.05$ ; Horizontal solid red line: Bonferroni adjusted p-value.

**Figure S4**

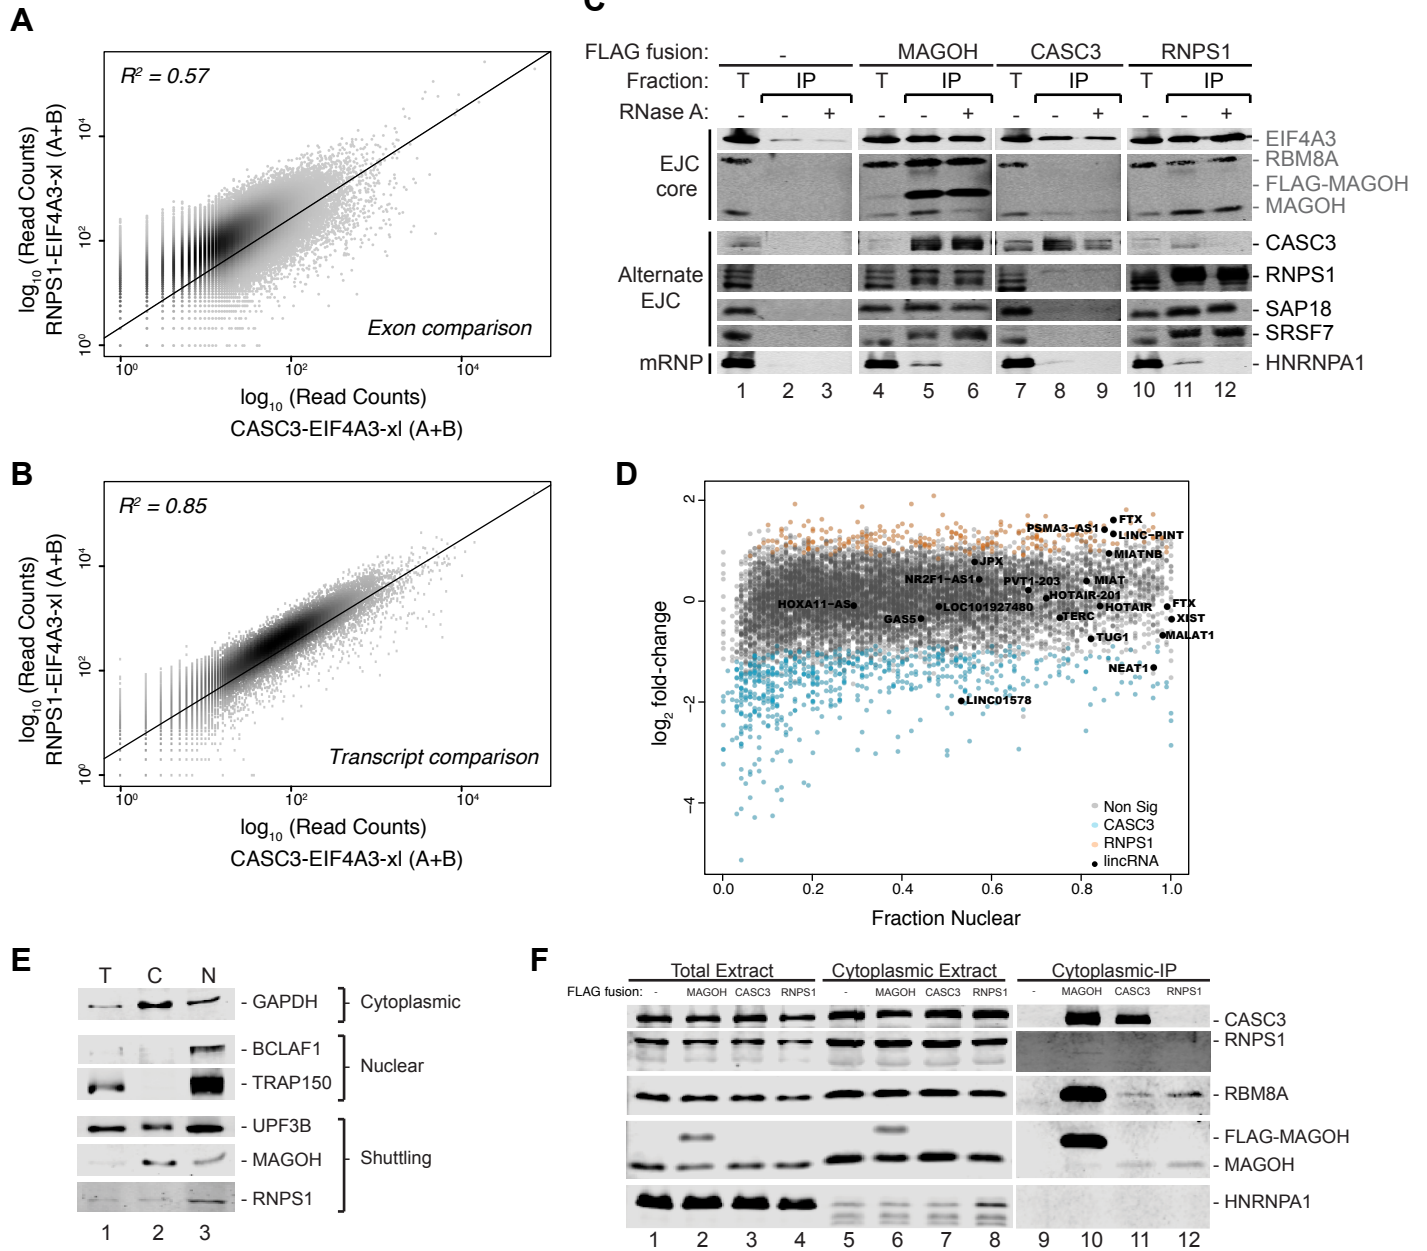



**Figure S4. (related to Figure 4)**

- (A) Comparison of read counts from both cross-linked replicates of CASC3-EJC (x-axis) versus RNPS1-EJC (y-axis). Each dot on the scatter plot represents each exon in the knownCanonical transcript annotation for UCSC known genes. A linear fit and coefficient of determination ( $R^2$ ) are shown.
- (B) Comparison of read counts from both cross-linked replicates of CASC3-EJC (x-axis) versus RNPS1-EJC (y-axis). Each dot on the scatter plot represents knownCanonical transcript for UCSC known genes. A linear fit and coefficient of determination ( $R^2$ ) are shown.
- (C) RNA dependent and independent interactions between EJC proteins. Western blots of proteins on the right in total extracts (T) or FLAG immunoprecipitates (IP) from HEK293 cells expressing FLAG-tagged proteins on the top. Inclusion of RNase A in extracts during IP is indicated on top of each lane.
- (D) Relative alternate EJC levels versus nuclear abundance of long non-coding RNAs (lncRNAs). Each dot on the scatter plot represents knownCanonical transcript with spliced lncRNAs labeled in black. CASC3 or RNPS1-enriched transcripts are colored as in the legend (bottom right). x-axis: -ve fold-change= CASC3-enrichment, +ve fold-change= RNPS1-enrichment.
- (E) Subcellular fractionation. Western blots for proteins on the right in total extracts (T), cytoplasmic (C), or nuclear (N) fractions of HEK293 cells.
- (F) Presence of alternate EJCs in cytoplasmic extracts. Western blots for proteins on the right in the fractions of HEK293 cells (top). FLAG-tagged proteins expressed in cells are indicated above each lane.

**Figure S5**

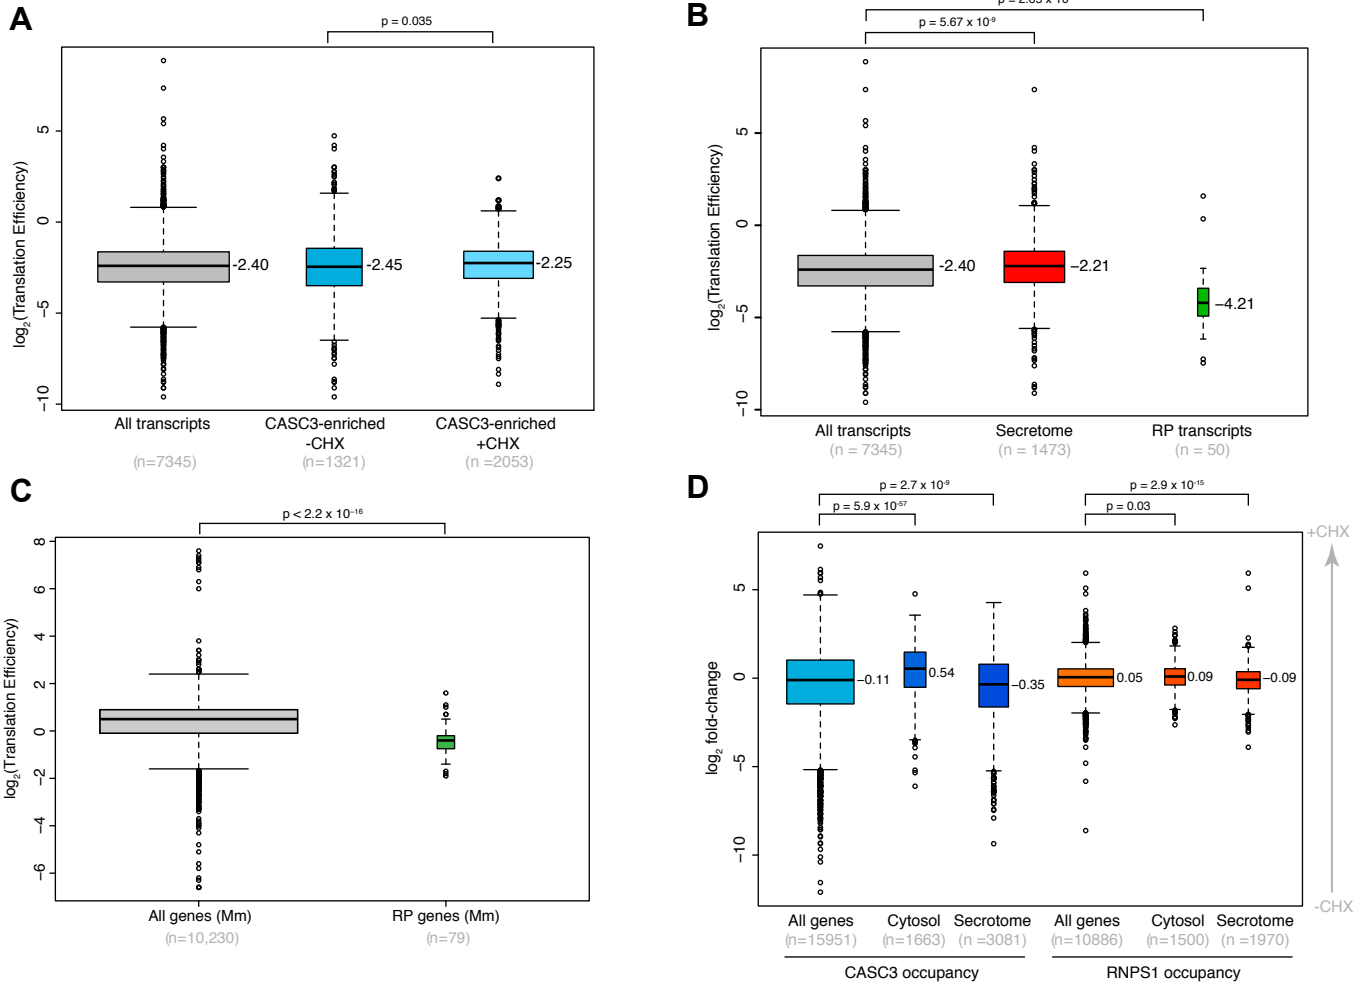

**Figure S5. (related to Figure 5)**

- (A) Box plots showing distribution of translation efficiency estimates (y-axis) of transcript groups on y-axis. The median values are given to the right of each box plot. Top: p-values (Wilcoxon rank sum test). Bottom: the number of transcripts in each group.
- (B) Comparison of translation efficiency (TE, y-axis) of secretome (red) and ribosomal protein (RP) transcripts (green) to all transcripts (grey). Number of genes in group are at the bottom. TE data from (Kiss et al., 2017).
- (C) Translation efficiency of RP genes in mouse embryonic stem cells. TE data from (Ingolia et al., 2011).
- (D) Box plots showing fold-change (y-axis) in alternate EJC occupancy (x-axis, at the bottom) for transcript groups shown at the bottom. x-axis: -ve fold-change= enrichment in -CHX condition, +ve fold-change= enrichment in +CHX condition. The median fold-change values are given to the right of each box plot. Top: p-values (Wilcoxon rank sum test). Bottom: the number of transcripts in each group.

**Figure S6**

**A**

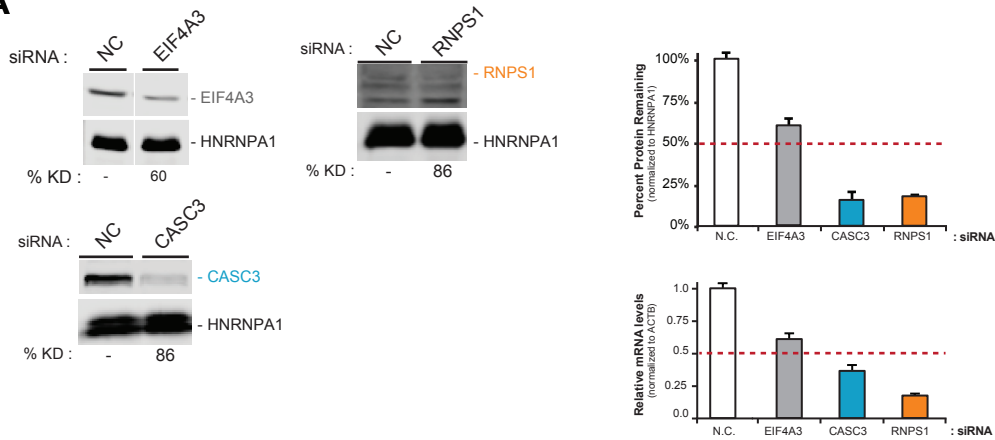

**B**

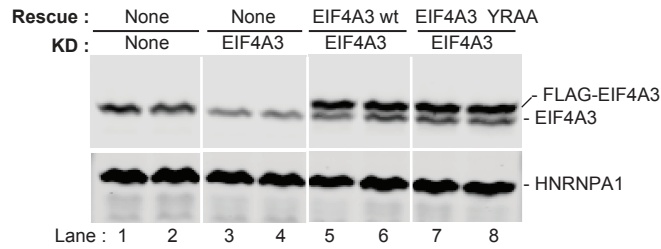

**C**

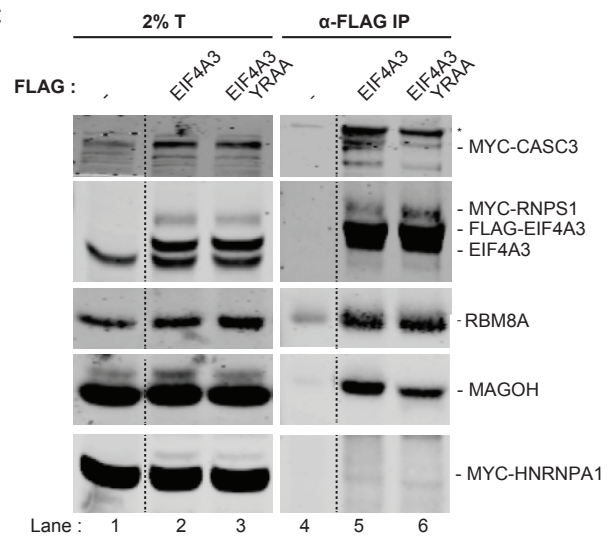

**D**

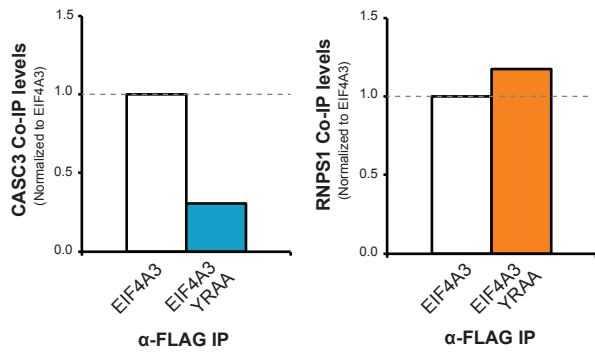

**E**

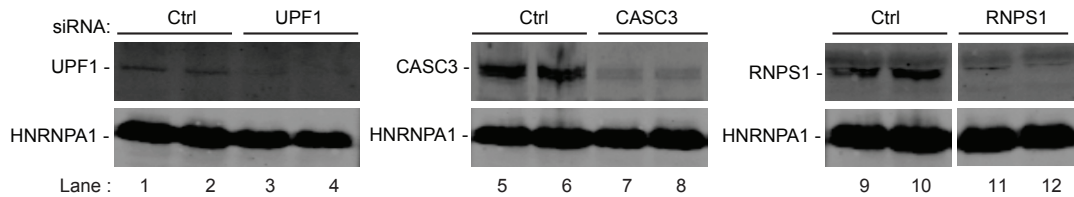

### Figure S6 (related to Figure 6)

- (A) Knockdowns of EJC proteins (related to Figure 6A). Western blots of EJC core and alternate factor siRNA-mediated knockdowns (left). Right, top: Quantification of knockdown efficiency of EJC protein remaining relative to HNRNPA1 protein levels. Right, bottom: Knockdown efficiency as determined by qPCR of EJC factor mRNA levels relative to ACTB mRNA levels .
- (B) Rescue of EIF4A3-depleted cells. Western blots for proteins on the right from HEK293 cells depleted of EIF4A3 and expressing either wild-type EIF4A3 or a mutant EIF4A3 lacking CASC3 interaction as indicated on the top.
- (C) Interaction of EIF4A3-YRAA with CASC3. Western blots showing proteins on the right in total extract or FLAG IPs from HEK293 cells expressing FLAG-tagged proteins on the top along with MYC-CASC3, -RNPS1, and -HNRNPA1. The asterisk indicates cross-reacting band likely to be unreduced FLAG-IgG heavy chain.
- (D) Quantification of western blots in (C) showing relative MYC-CASC3 (left, blue) and MYC-RNPS1 (right, orange) co-IP with FLAG-EIF4A3 proteins on the bottom.
- (E) Knockdown of EJC/UPF1 proteins (Figure 6C). Western blots showing proteins indicated on the left from HeLa Tet-off cells treated with siRNAs indicated on the top. Two technical replicates of each knockdown are shown. HNRNPA1 panel shown in lanes 5-6 is shown again in lanes 9-10.

**Figure S7**

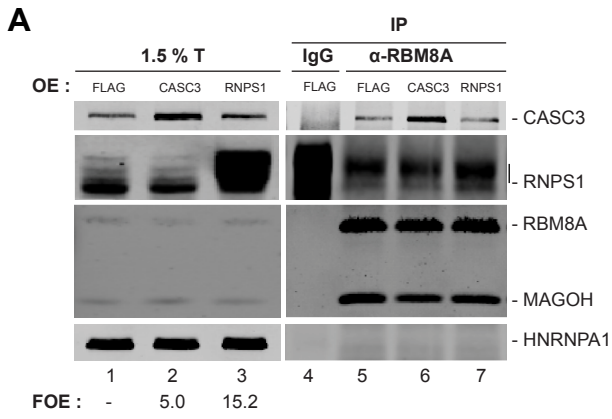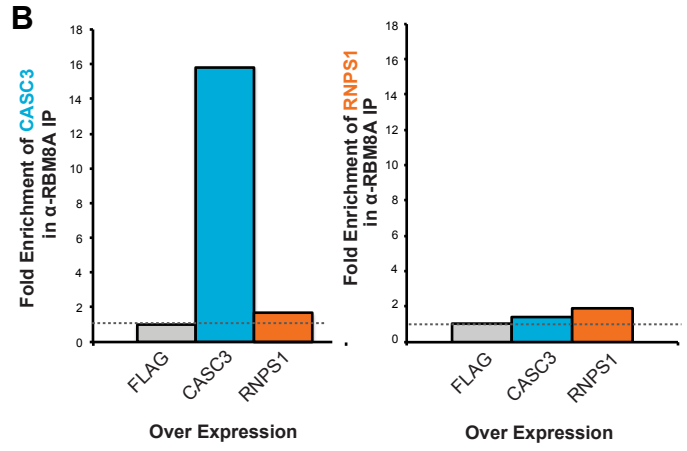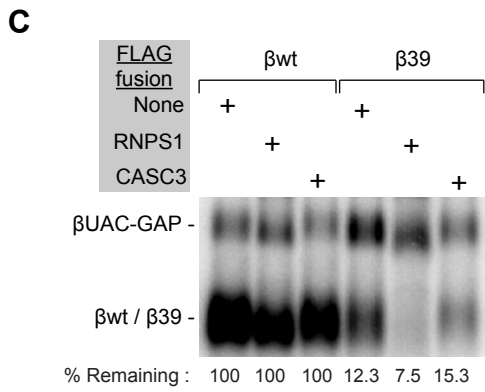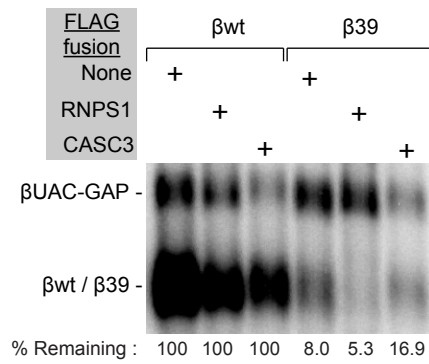

### Figure S7 (related to Figure 7)

- (A) Effect of alternate EJC factor overexpression on EJC composition. Western blots for proteins on the right in total extract (lanes 1-3), control IgG IP (lane 4) or RBM8A IPs (lanes 5-7) from HEK293 cells overexpressing (OE) FLAG-fusion proteins at top. Fold overexpression (FOE) on bottom is relative to protein levels in lane 1 after normalizing to HNRNPA1 protein levels in particular lane.
- (B) Quantification of (A) for co-IP of CASC3 (left) or RNPS1 (right) upon RBM8A IP from cell lines overexpressing the proteins on the bottom. Fold enrichment was normalized by co-purifying MAGOH levels.
- (C) Effect of alternate EJC overexpression on  $\beta$ -globin NMD. Northern blots showing levels of wild-type  $\beta$ -globin RNA ( $\beta$ wt) and an NMD-targeted  $\beta$ -globin RNA ( $\beta$ 39) (as indicated on the top) along with co-transfected  $\beta$ UAC-GAP RNA from HeLa cells expressing alternate EJC factors (top left). % Remaining:  $\beta$ wt or  $\beta$ 39 levels in each sample were normalized to  $\beta$ UAC-GAP RNA. Numbers below each lane show normalized  $\beta$ 39 RNA remaining as % of normalized  $\beta$ wt RNA for the corresponding treatment (set to 100). Two independent replicates are shown.

**Table S1.** Summary of proteins identified by LC-MS/MS in the two replicates of FLAG-EJC and FLAG-only IPs.

| <b>#Alternate EJC_replicate1</b>                                                                                                                                                                                       |             |             |             |
|------------------------------------------------------------------------------------------------------------------------------------------------------------------------------------------------------------------------|-------------|-------------|-------------|
| 341 proteins at 99% minimum, 2 minimum peptides, 0.0% decoy FDR;; 9540 spectra at 95% minimum, 0.00% decoy FDR                                                                                                         |             |             |             |
| From proteins clusters, only member proteins with a non-zero value in at least one sample were retained                                                                                                                |             |             |             |
| Normalized spectral abundance factor (NSAF) values from Scaffold were used for quantitation; a psuedo count of 0.000001 was added to each NSAF value before determining enrichment in EJC IPs as compared to FLAG-only |             |             |             |
| Proteins enriched >2-fold in any of the three EJC IPs over FLAG-only IP are shown                                                                                                                                      |             |             |             |
|                                                                                                                                                                                                                        |             |             |             |
|                                                                                                                                                                                                                        | log2(NSAF)  |             |             |
| Accession Number                                                                                                                                                                                                       | MAGOH       | CASC3       | RNPS1       |
| SAP18_HUMAN                                                                                                                                                                                                            | 12.12344246 | 9.600730633 | 13.95255926 |
| LC7L2_HUMAN                                                                                                                                                                                                            | 10.76661172 | 0           | 12.67785175 |
| SRSF1_HUMAN                                                                                                                                                                                                            | 9.42840205  | 8.905056005 | 11.86905398 |
| H4_HUMAN                                                                                                                                                                                                               | 12.27926234 | 12.49192823 | 11.75826486 |
| SRSF6_HUMAN                                                                                                                                                                                                            | 11.27676417 | 0           | 11.69657638 |
| PR40A_HUMAN                                                                                                                                                                                                            | 11.06379952 | 0           | 11.54245153 |
| SCML1_HUMAN                                                                                                                                                                                                            | 0           | 0           | 11.46142829 |
| PRP4B_HUMAN                                                                                                                                                                                                            | 11.4926043  | 0           | 11.23463783 |
| RBM25_HUMAN                                                                                                                                                                                                            | 10.46954007 | 0           | 11.04753294 |
| GPTC8_HUMAN                                                                                                                                                                                                            | 8.417008587 | 0           | 10.96275144 |
| SNIP1_HUMAN                                                                                                                                                                                                            | 0           | 0           | 10.95325069 |
| SRSF7_HUMAN                                                                                                                                                                                                            | 9.487699374 | 0           | 10.81338039 |
| TRA2A_HUMAN                                                                                                                                                                                                            | 10.24210228 | 0           | 10.79100005 |
| PPIG_HUMAN                                                                                                                                                                                                             | 8.82527683  | 0           | 10.73479428 |
| DDX41_HUMAN                                                                                                                                                                                                            | 10.10105646 | 0           | 10.64988486 |
| CWC22_HUMAN                                                                                                                                                                                                            | 10.55487659 | 0           | 10.10446771 |
| SRS10_HUMAN                                                                                                                                                                                                            | 9.349303347 | 0           | 10.09037711 |
| CRNL1_HUMAN                                                                                                                                                                                                            | 9.654385415 | 0           | 9.980853606 |
| MGN_HUMAN                                                                                                                                                                                                              | 12.77585716 | 12.25168951 | 9.934059395 |
| CATIN_HUMAN                                                                                                                                                                                                            | 9.81605565  | 0           | 9.879828273 |
| CSK21_HUMAN                                                                                                                                                                                                            | 0           | 0           | 9.834897633 |
| SRSF3_HUMAN                                                                                                                                                                                                            | 0           | 0           | 9.766512345 |
| RBM8A_HUMAN                                                                                                                                                                                                            | 12.93774162 | 11.73564064 | 9.681238412 |
| ANM1_HUMAN                                                                                                                                                                                                             | 8.887708033 | 0           | 9.628390857 |
| SRSF5_HUMAN                                                                                                                                                                                                            | 9.295332732 | 0           | 9.621740545 |
| CDK12_HUMAN                                                                                                                                                                                                            | 9.840982435 | 0           | 9.583195621 |
| RPB1_HUMAN                                                                                                                                                                                                             | 10.1382718  | 0           | 9.572643389 |
| RL6_HUMAN                                                                                                                                                                                                              | 10.21176665 | 12.0086037  | 9.539391485 |
| PGAM5_HUMAN                                                                                                                                                                                                            | 9.208014828 | 0           | 9.534400161 |
| CCNK_HUMAN                                                                                                                                                                                                             | 0           | 0           | 9.529430554 |
| SRSF4_HUMAN                                                                                                                                                                                                            | 8.43629512  | 0           | 9.497971558 |
| PLRG1_HUMAN                                                                                                                                                                                                            | 9.961290512 | 0           | 9.440786132 |
| RBM22_HUMAN                                                                                                                                                                                                            | 9.668034004 | 0           | 9.410281737 |
| ZC3HE_HUMAN                                                                                                                                                                                                            | 9.443979543 | 0           | 9.408329741 |



|             |             |              |             |
|-------------|-------------|--------------|-------------|
| SRSF9_HUMAN | 0           | 0            | 9.336752009 |
| DHX8_HUMAN  | 10.1291542  | 0            | 9.331432034 |
| H2AY_HUMAN  | 9.842915995 | 8.321612471  | 9.170726276 |
| RU2A_HUMAN  | 0           | 0            | 9.130647779 |
| H2A1A_HUMAN | 0           | 0            | 9.091646948 |
| RT29_HUMAN  | 0           | 0            | 9.073445375 |
| ZCH18_HUMAN | 9.807709112 | 0            | 9.036201092 |
| SRSF8_HUMAN | 0           | 0            | 8.985699652 |
| SPT6H_HUMAN | 7.634593268 | 0            | 8.957073013 |
| NKTR_HUMAN  | 9.675904121 | 0            | 8.933572638 |
| CD11A_HUMAN | 0           | 0            | 8.834629058 |
| CWC27_HUMAN | 8.501837185 | 0            | 8.82791427  |
| DGC14_HUMAN | 0           | 0            | 8.815767536 |
| AKP8L_HUMAN | 8.050556113 | 0            | 8.790283326 |
| RBBP6_HUMAN | 6.588219912 | 0            | 8.77778133  |
| FXR2_HUMAN  | 7.991748578 | 0            | 8.731352976 |
| CSK22_HUMAN | 0           | 0            | 8.674721924 |
| HP1B3_HUMAN | 9.271719795 | 7.75181182   | 8.599950025 |
| LUC7L_HUMAN | 0           | 0            | 8.590886411 |
| SNUT2_HUMAN | 0           | 0            | 8.569058109 |
| FIP1_HUMAN  | 8.171226847 | 0            | 8.497053445 |
| CMBL_HUMAN  | 0           | 12.08988078  | 8.190713617 |
| SMU1_HUMAN  | 9.964095343 | 0            | 8.124793379 |
| RS4X_HUMAN  | 0           | 9.818933622  | 8.088788239 |
| NCBP1_HUMAN | 0           | 0            | 8.0869854   |
| PHRF1_HUMAN | 9.017838416 | 0            | 8.025527183 |
| SRRT_HUMAN  | 8.609437329 | 0            | 7.938462236 |
| PAXB1_HUMAN | 7.547434405 | 0            | 7.87276721  |
| RBMX_HUMAN  | 0           | 0            | 7.519243094 |
| GPTC1_HUMAN | 7.525755693 | 0            | 7.269126679 |
| RECQ5_HUMAN | 9.015526561 | 0            | 7.179610571 |
| PPWD1_HUMAN | 10.04644195 | 0            | 6.799993888 |
| PININ_HUMAN | 6.8673278   | -6.910133013 | 6.25017964  |
| IF4A3_HUMAN | 6.771047915 | 6.220329511  | 6.19106795  |
| DDB1_HUMAN  | 0           | 8.704906538  | 5.99047842  |
| SON_HUMAN   | 6.126682474 | -5.179948888 | 5.676165346 |
| TCOF_HUMAN  | 0           | 7.326069892  | 5.61303063  |
| SFR19_HUMAN | 5.367405791 | -6.048388784 | 4.575401278 |
| SRRM1_HUMAN | 4.360907368 | 0.470829819  | 4.257178256 |
| RNPS1_HUMAN | 3.31613842  | -0.526593813 | 4.227919599 |
| ACINU_HUMAN | 4.051882067 | -1.108281217 | 4.080682378 |
| LC7L3_HUMAN | 3.797146519 | -7.636334602 | 4.053576036 |
| RBM39_HUMAN | 3.799733114 | -8.33860269  | 3.82174148  |
| TRA2B_HUMAN | 3.801634108 | -9.216479117 | 3.594192925 |
| PUF60_HUMAN | 1.989468646 | 1.466254652  | 3.314884359 |
| RPB2_HUMAN  | 3.56347561  | -6.206428335 | 3.305719523 |
| PCBP1_HUMAN | 1.992068594 | 2.052717845  | 3.192553494 |
| SRRM2_HUMAN | 3.974038446 | -2.821225465 | 3.167279714 |
| SNW1_HUMAN  | 1.989809969 | 0.46980974   | 3.052499512 |

|                     |              |              |              |
|---------------------|--------------|--------------|--------------|
| PRP17_HUMAN         | 2.573419515  | -7.216260837 | 2.899953146  |
| RL3_HUMAN           | 2.5786637    | 1.470114407  | 2.735523603  |
| TR150_HUMAN         | 2.749709192  | -9.486633935 | 2.409244244  |
| BCLF1_HUMAN         | 2.802239395  | -9.54041868  | 2.26048122   |
| SYF1_HUMAN          | 2.453011539  | -1.520974484 | 2.259183547  |
| U2AF2_HUMAN         | 0.994555861  | -8.496174702 | 2.057358601  |
| GNL3_HUMAN          | 0.991971421  | 0.46977667   | 2.053387389  |
| HNRPF_HUMAN         | 2.575736378  | 2.466527005  | 1.733568579  |
| AQR_HUMAN           | 1.408956925  | -8.436878077 | 1.674127144  |
| XRCC6_HUMAN         | 0.581108117  | -0.941562133 | 1.322646441  |
| PRP8_HUMAN          | 1.132917086  | -3.823514146 | 1.143372415  |
| CLK3_HUMAN          | 0.993848117  | -8.071944968 | 1.057569892  |
| OAT_HUMAN           | -9.929302799 | 2.734055165  | 1.000769209  |
| CDC5L_HUMAN         | 2.073375358  | -9.907942177 | 0.960108676  |
| H2A1J_HUMAN         | 0.58130639   | 1.056951881  | 0.738216988  |
| ODB2_HUMAN          | 0.994496198  | 2.638771496  | 0.736795312  |
| TBA1A_HUMAN         | -7.574555686 | 2.466145001  | 0.735420807  |
| NOP56_HUMAN         | 0.991616276  | 0.469501869  | 0.734475527  |
| HS71L_HUMAN         | 0.991118205  | 0.469252722  | 0.734107857  |
| SSRP1_HUMAN         | 0.99505304   | -1.522078189 | 0.544862646  |
| PPM1B_HUMAN         | 0.20003204   | 1.577484201  | 0.308705987  |
| U5S1_HUMAN          | 1.298784908  | -2.846251758 | 0.290901674  |
| SP16H_HUMAN         | 1.315840207  | -1.519385898 | 0.060224306  |
| CASC3_HUMAN         | 11.73089465  | 13.48645796  | 0            |
| WIBG_HUMAN          | 11.70852352  | 10.18512321  | 0            |
| CCDC9_HUMAN         | 9.914400082  | 0            | 0            |
| RL5_HUMAN           | 9.168697186  | 10.22809716  | 0            |
| REN3B_HUMAN         | 8.468705491  | 10.74852832  | 0            |
| BOLA2_HUMAN         | 0            | 12.01531051  | 0            |
| RL13_HUMAN          | 0            | 10.13647852  | 0            |
| RO52_HUMAN          | 0            | 9.551362204  | 0            |
| P53_HUMAN           | 0            | 9.24026662   | 0            |
| PRDX2_HUMAN         | 0            | 9.229299509  | 0            |
| GSHR_HUMAN          | 0            | 8.831528936  | 0            |
| C1TM_HUMAN          | 0            | 8.511475946  | 0            |
| TBB2A_HUMAN         | 0            | 8.063988217  | 0            |
| LAP2A_HUMAN         | 0            | 7.425845306  | 0            |
| EF1A1_HUMAN<br>(+1) | -0.22569663  | 1.249191701  | -0.068927127 |
| TBB5_HUMAN          | -0.00348044  | 0.986567489  | -0.161984954 |
| IRS4_HUMAN          | 0.986035447  | 2.776196272  | -0.257407108 |
| DJC10_HUMAN         | -6.766065051 | 1.463811228  | -0.258872981 |
| RS8_HUMAN           | 2.578589362  | 1.470068567  | -0.26084481  |
| EFTU_HUMAN          | 0.410946763  | 1.692939326  | -0.261061789 |
| STK38_HUMAN         | -0.003433705 | 1.056732389  | -0.261408701 |
| REST_HUMAN          | -1.3198622   | 1.848156873  | -0.581625339 |
| CK084_HUMAN         | -11.39580187 | 1.346444398  | -0.676241922 |
| RL4_HUMAN           | 1.731826571  | 2.344806224  | -0.844616109 |
| TBA4A_HUMAN         | -0.003471556 | 1.055272517  | -1.256318815 |

|             |              |             |              |
|-------------|--------------|-------------|--------------|
| ILF2_HUMAN  | -8.779916297 | 1.055549917 | -1.256981736 |
| SERA_HUMAN  | -0.225705018 | 0.986138055 | -1.481694665 |
| CLAP2_HUMAN | -0.58481771  | 2.051714144 | -1.827854863 |
| HNRPL_HUMAN | -8.770135276 | 1.470179053 | -1.837979591 |
| E2F7_HUMAN  | -9.140190703 | 1.055919581 | -1.839883907 |
| SERPH_HUMAN | -7.683626283 | 1.467796235 | -7.683626283 |
| HDAC6_HUMAN | -0.584962501 | 1.689961089 | -7.72900887  |
| AIFM1_HUMAN | -8.129386063 | 1.054571811 | -8.129386063 |

| <b>#Alternate EJC_replicate2</b>                                                                                                                                                                                       |             |             |             |
|------------------------------------------------------------------------------------------------------------------------------------------------------------------------------------------------------------------------|-------------|-------------|-------------|
| 175 proteins at 99% minimum, 2 minimum peptides, 0.0% decoy FDR;; 7282 spectra at 95% minimum, 0.00% decoy FDR                                                                                                         |             |             |             |
| From proteins clusters, only member proteins with a non-zero value in at least one sample were retained                                                                                                                |             |             |             |
| Normalized spectral abundance factor (NSAF) values from Scaffold were used for quantitation; a psuedo count of 0.000001 was added to each NSAF value before determining enrichment in EJC IPs as compared to FLAG-only |             |             |             |
| Proteins enriched >2-fold in any of the three EJC IPs over FLAG-only IP are shown                                                                                                                                      |             |             |             |
|                                                                                                                                                                                                                        |             | log2(NSAF)  |             |
| Accession Number                                                                                                                                                                                                       | Magoh       | MLN51       | RNPS1       |
| IF4A3_HUMAN                                                                                                                                                                                                            | 13.7638348  | 11.03967305 | 13.42245903 |
| RNPS1_HUMAN                                                                                                                                                                                                            | 12.09199728 | 0           | 13.31783654 |
| MGN_HUMAN                                                                                                                                                                                                              | 14.55895875 | 10.9479291  | 12.93590168 |
| SMD1_HUMAN                                                                                                                                                                                                             | 11.36260139 | 0           | 12.86834029 |
| PININ_HUMAN                                                                                                                                                                                                            | 13.14623453 | 0           | 12.80982841 |
| H2A1D_HUMAN (+6)                                                                                                                                                                                                       | 12.04217235 | 0           | 12.74081375 |
| ACINU_HUMAN                                                                                                                                                                                                            | 12.39159267 | 0           | 12.71647653 |
| H4_HUMAN                                                                                                                                                                                                               | 0           | 0           | 12.5912652  |
| RU2A_HUMAN                                                                                                                                                                                                             | 10.8482317  | 12.3128546  | 12.48507456 |
| SRSF7_HUMAN                                                                                                                                                                                                            | 11.68439798 | 0           | 12.23101112 |
| SRSF1_HUMAN                                                                                                                                                                                                            | 11.30320995 | 0           | 12.08921873 |
| SAP18_HUMAN                                                                                                                                                                                                            | 11.32198445 | 0           | 12.02049387 |
| LC7L3_HUMAN                                                                                                                                                                                                            | 11.50248377 | 0           | 12.00842862 |
| RBM39_HUMAN                                                                                                                                                                                                            | 11.5997734  | 0           | 11.9935753  |
| SF3B1_HUMAN                                                                                                                                                                                                            | 11.7159191  | 11.37378957 | 11.79709406 |
| SMD3_HUMAN                                                                                                                                                                                                             | 0           | 0           | 11.78610623 |
| TRA2B_HUMAN                                                                                                                                                                                                            | 10.6727789  | 0           | 11.69300772 |
| U5S1_HUMAN                                                                                                                                                                                                             | 11.46183752 | 0           | 11.67511904 |
| RBM25_HUMAN                                                                                                                                                                                                            | 11.0617087  | 0           | 11.52214012 |
| PRP19_HUMAN                                                                                                                                                                                                            | 12.03479896 | 0           | 11.43827206 |
| RUXE_HUMAN                                                                                                                                                                                                             | 0           | 0           | 11.4325941  |
| SRRM1_HUMAN                                                                                                                                                                                                            | 11.72250872 | 0           | 11.38392025 |
| TR150_HUMAN                                                                                                                                                                                                            | 11.78418496 | 0           | 11.26631806 |
| SRRM2_HUMAN                                                                                                                                                                                                            | 11.4604559  | 0           | 11.23038076 |
| H13_HUMAN                                                                                                                                                                                                              | 0           | 12.51929225 | 11.16835873 |
| SRSF9_HUMAN                                                                                                                                                                                                            | 0           | 0           | 11.16835873 |

|                     |             |             |             |
|---------------------|-------------|-------------|-------------|
| LC7L2_HUMAN         | 10.64304445 | 0           | 11.1489214  |
| PR40A_HUMAN         | 10.74760559 | 0           | 11.14134082 |
| RSMB_HUMAN<br>(+1)  | 9.352175878 | 11.55252501 | 11.04937211 |
| RU2B_HUMAN          | 0           | 11.32378662 | 10.94989965 |
| PRP4B_HUMAN         | 9.453003062 | 0           | 10.93472289 |
| SRSF3_HUMAN         | 10.48522554 | 0           | 10.92072502 |
| U520_HUMAN          | 9.841595796 | 0           | 10.89565101 |
| BCLF1_HUMAN         | 11.90358063 | 0           | 10.86581058 |
| SRSF6_HUMAN         | 9.832177982 | 0           | 10.70017959 |
| SMD2_HUMAN          | 0           | 0           | 10.65883628 |
| SNR40_HUMAN         | 10.7779128  | 0           | 10.64664871 |
| SF3B6_HUMAN         | 0           | 0           | 10.57572832 |
| H2B1C_HUMAN<br>(+8) | 0           | 10.16100588 | 10.56424478 |
| SF3A2_HUMAN         | 11.20683123 | 10.28019079 | 10.55803798 |
| U2AF2_HUMAN         | 9.688757349 | 0           | 10.52424786 |
| PPIG_HUMAN          | 9.700179593 | 0           | 10.39820926 |
| DDX41_HUMAN         | 10.78422586 | 0           | 10.37634248 |
| SNW1_HUMAN          | 10.89193556 | 0           | 10.35005518 |
| FIP1_HUMAN          | 0           | 0           | 10.32732808 |
| CDC5L_HUMAN         | 11.13359178 | 0           | 10.30924896 |
| PCBP1_HUMAN         | 9.782768932 | 0           | 10.28840471 |
| SRS10_HUMAN         | 10.54631572 | 0           | 10.24531501 |
| RS4X_HUMAN          | 10.21916852 | 0           | 10.23983717 |
| SCML1_HUMAN         | 0           | 0           | 10.17990909 |
| RBMX_HUMAN          | 10.45419646 | 0           | 10.15317199 |
| PRP8_HUMAN          | 8.771390425 | 0           | 10.12528431 |
| CH60_HUMAN          | 11.00204143 | 0           | 10.11647393 |
| RBM22_HUMAN         | 10.54361188 | 0           | 10.05012073 |
| XRCC6_HUMAN         | 0           | 0           | 9.876777836 |
| H33_HUMAN           | 0           | 0           | 9.86968637  |
| TRA2A_HUMAN         | 0           | 0           | 9.817655232 |
| RIOK1_HUMAN         | 10.27821712 | 10.79547151 | 9.807483728 |
| BUD31_HUMAN         | 0           | 0           | 9.787314917 |
| CCNK_HUMAN          | 9.66370041  | 0           | 9.777353958 |
| SON_HUMAN           | 9.968090752 | 0           | 9.757306662 |
| GRP75_HUMAN         | 10.5510353  | 0           | 9.71998768  |
| RS18_HUMAN          | 0           | 0           | 9.709411269 |
| AQR_HUMAN           | 9.307861087 | 0           | 9.669062209 |
| RL7_HUMAN           | 0           | 0           | 9.588246152 |
| RL7A_HUMAN          | 0           | 0           | 9.487297414 |
| XRCC5_HUMAN         | 0           | 0           | 9.441989675 |
| ISY1_HUMAN          | 9.688757349 | 0           | 9.387909618 |
| PGAM5_HUMAN         | 9.08459582  | 0           | 9.367829698 |
| RS2_HUMAN           | 9.064796646 | 10.52816105 | 9.348042047 |
| CSK21_HUMAN         | 0           | 0           | 9.3468018   |
| SNIP1_HUMAN         | 8.631140669 | 0           | 9.328495421 |
| SMU1_HUMAN          | 10.42500604 | 0           | 9.277054876 |

|                     |             |             |             |
|---------------------|-------------|-------------|-------------|
| SR140_HUMAN         | 9.421854445 | 10.59039992 | 9.272839701 |
| PR38A_HUMAN         | 0           | 0           | 9.257529276 |
| RLA0_HUMAN          | 9.535430915 | 8.831845581 | 9.234625857 |
| GPTC8_HUMAN         | 0           | 0           | 9.21273955  |
| SFR19_HUMAN         | 8.226074963 | 0           | 9.185494924 |
| SNUT1_HUMAN         | 7.620366471 | 0           | 9.121714814 |
| PAXB1_HUMAN         | 9.003855181 | 0           | 9.117435318 |
| H2A1A_HUMAN<br>(+2) | 0           | 0           | 8.925168681 |
| RL3_HUMAN           | 0           | 0           | 8.888986721 |
| HNRH1_HUMAN         | 9.034001065 | 0           | 8.733388238 |
| TBA1B_HUMAN         | 9.027601948 | 0           | 8.727001465 |
| PPIE_HUMAN          | 0           | 0           | 8.725400344 |
| HNRPC_HUMAN         | 10.00084508 | 10.4655664  | 8.701687664 |
| GRP78_HUMAN         | 9.490690457 | 0           | 8.6061831   |
| PLRG1_HUMAN         | 8.255972742 | 0           | 8.538848521 |
| RED_HUMAN           | 8.72369507  | 0           | 8.423241996 |
| CDK12_HUMAN         | 7.722602637 | 0           | 8.418738108 |
| PRP17_HUMAN         | 10.08081753 | 0           | 8.3675458   |
| DDX21_HUMAN         | 8.647602329 | 0           | 8.347178416 |
| RBBP6_HUMAN         | 7.04537744  | 0           | 8.322694323 |
| SPF45_HUMAN         | 10.61028666 | 10.07588021 | 8.312701473 |
| NKAP_HUMAN          | 0           | 0           | 8.263363107 |
| RL4_HUMAN           | 9.842271763 | 0           | 8.222360218 |
| SYF1_HUMAN          | 8.842161743 | 0           | 8.220668531 |
| SRRT_HUMAN          | 8.072427412 | 0           | 8.185767456 |
| MFAP1_HUMAN         | 0           | 0           | 8.182493675 |
| OAT_HUMAN           | 0           | 0           | 8.182493675 |
| CWC22_HUMAN         | 8.434503133 | 0           | 8.13422094  |
| EF1A1_HUMAN<br>(+1) | 8.409348503 | 0           | 8.109099329 |
| SRS11_HUMAN         | 0           | 0           | 8.04220656  |
| HNRPM_HUMAN         | 9.33230514  | 0           | 8.034358798 |
| DHX8_HUMAN          | 0           | 0           | 8.03039126  |
| ZC3HE_HUMAN         | 9.734997453 | 0           | 8.022589749 |
| SPTN1_HUMAN         | 8.574139362 | 6.877866923 | 8.011674533 |
| TAB1_HUMAN          | 8.867618521 | 9.162265434 | 7.984019633 |
| MATR3_HUMAN         | 0           | 0           | 7.820753373 |
| CRNL1_HUMAN         | 8.119096751 | 0           | 7.819029455 |
| CHERP_HUMAN         | 8.008204497 | 0           | 7.708256223 |
| CDK13_HUMAN         | 0           | 0           | 7.401903472 |
| MYH9_HUMAN          | 9.229515825 | 9.372473325 | 7.34978987  |
| TBB4B_HUMAN         | 9.046878442 | 8.343807528 | 7.168020189 |
| ZCH18_HUMAN         | 0           | 0           | 7.070067262 |
| NKTR_HUMAN          | 0           | 0           | 7.037821465 |
| IPO8_HUMAN          | 8.564416278 | 8.124017889 | 6.949184722 |
| CAMP3_HUMAN         | 0           | 0           | 6.683134985 |
| MAP1B_HUMAN         | 0           | 0           | 6.29000041  |
| SPTB2_HUMAN         | 6.649256178 | 0           | 5.775182264 |

|             |             |             |             |
|-------------|-------------|-------------|-------------|
| FLNA_HUMAN  | 7.218393711 | 0           | 5.615210284 |
| IF4B_HUMAN  | 2.319331128 | 3.873106719 | 1.625925187 |
| RBM8A_HUMAN | 11.39943816 | 0           | 0           |
| CASC3_HUMAN | 11.19241612 | 12.26488238 | 0           |
| CCDC9_HUMAN | 10.20554891 | 0           | 0           |
| COR1C_HUMAN | 9.691795853 | 10.24946904 | 0           |
| REN3B_HUMAN | 9.664678382 | 0           | 0           |
| PYM1_HUMAN  | 9.586314394 | 0           | 0           |
| HNRPK_HUMAN | 8.989791843 | 0           | 0           |
| HNRPR_HUMAN | 8.953701754 | 0           | 0           |
| SRSF4_HUMAN | 8.896483781 | 0           | 0           |
| SLU7_HUMAN  | 8.65065687  | 0           | 0           |
| FL2D_HUMAN  | 8.631140669 | 0           | 0           |
| HNRPF_HUMAN | 8.563692024 | 0           | 0           |
| OTUD4_HUMAN | 7.727103604 | 0           | 0           |
| LIMA1_HUMAN | 7.695854658 | 8.572851782 | 0           |
| TBA1C_HUMAN | 7.454504938 | 0           | 0           |
| K2C8_HUMAN  | 7.349878311 | 0           | 0           |
| TMOD3_HUMAN | 0           | 11.26315181 | 0           |
| PRDX1_HUMAN | 0           | 11.0860035  | 0           |

**Table S2.** Summary of all described RIPit-Seq and RNA-Seq libraries.

\*All numbers represent unique counts  
 \*\*Tables A-D show counts in sequential order of processing

**Table A.** Multi-mapping and PCR duplicate read removal

| <i>Library</i>           | <i>TopHat Input Total</i> | <i>Mapped</i> | <i>(%)</i> | <i>Multi-Mapped</i> | <i>(%)</i> | <i>Input Reads</i> | <i>Multi-Mappers</i> | <i>(%)</i> | <i>PCR Duplicates</i> | <i>(%)</i> |
|--------------------------|---------------------------|---------------|------------|---------------------|------------|--------------------|----------------------|------------|-----------------------|------------|
| MAGOH-EIF4A3             | 12289132                  | 11788001      | 95.92      | 919103              | 7.8        | 11788001           | 919103               | 7.8        | 38395                 | 0.33       |
| CASC3-EIF4A3             | 7918724                   | 7552965       | 95.38      | 501748              | 6.64       | 7552965            | 501748               | 6.64       | 14235                 | 0.19       |
| RNPS1-EIF4A3             | 9353236                   | 8964991       | 95.85      | 921854              | 10.28      | 8964991            | 921854               | 10.28      | 16528                 | 0.18       |
| MAGOH-CASC3              | 6792045                   | 6423758       | 94.58      | 408153              | 6.35       | 6423758            | 408153               | 6.35       | 31314                 | 0.49       |
| MAGOH-RNPS1              | 11996168                  | 11169040      | 93.11      | 617910              | 5.53       | 11169040           | 617910               | 5.53       | 35527                 | 0.32       |
| CASC3-EIF4A3-XL-A        | 5718072                   | 5309270       | 92.85      | 370143              | 6.97       | 5309270            | 370143               | 6.97       | 10068                 | 0.19       |
| CASC3-EIF4A3-XL-B        | 21898851                  | 20055735      | 91.58      | 3554071             | 17.72      | 20055735           | 3554071              | 17.72      | 2013494               | 10.04      |
| RNPS1-EIF4A3-XL-A        | 8370005                   | 7838852       | 93.65      | 651639              | 8.31       | 7838852            | 651639               | 8.31       | 23133                 | 0.3        |
| RNPS1-EIF4A3-XL-B        | 24859586                  | 23434622      | 94.27      | 4666719             | 19.91      | 23434622           | 4666719              | 19.91      | 715018                | 3.05       |
| CASC3-EIF4A3-XL-A (+CHX) | 15795694                  | 15084794      | 95.5       | 684318              | 4.54       | 15084794           | 684318               | 4.54       | 182916                | 1.21       |
| CASC3-EIF4A3-XL-B (+CHX) | 13937900                  | 13413713      | 96.24      | 523380              | 3.9        | 13413713           | 523380               | 3.9        | 75455                 | 0.56       |
| RNPS1-EIF4A3-XL-A (+CHX) | 27687914                  | 26580410      | 96         | 2258708             | 8.5        | 26580410           | 2258708              | 8.5        | 187891                | 0.71       |
| RNPS1-EIF4A3-XL-B (+CHX) | 2532100                   | 2274851       | 89.84      | 95329               | 4.19       | 2274851            | 95329                | 4.19       | 26077                 | 1.15       |
| RNA-Seq-A                | 18740947                  | 12180518      | 64.99      | 4873419             | 40.01      | 12180518           | 4873419              | 40.01      | 58947                 | 0.48       |
| RNA-Seq-B                | 19476485                  | 12592943      | 64.66      | 4811993             | 38.21      | 12592943           | 4811993              | 38.21      | 46021                 | 0.37       |

**Table B.** Removal of miscellaneous RNAs

| <i>Library</i>           | <i>Mitochondrial</i> | <i>(%)</i> | <i>miRNA</i> | <i>(%)</i> | <i>(%)</i> | <i>rRNA (+ChrUn)</i> | <i>(%)</i> | <i>scaRNA</i> | <i>(%)</i> | <i>snoRNA</i> | <i>(%)</i> | <i>snRNA</i> | <i>(%)</i> | <i>tRNA</i> | <i>(%)</i> | <i>Final Count</i> |
|--------------------------|----------------------|------------|--------------|------------|------------|----------------------|------------|---------------|------------|---------------|------------|--------------|------------|-------------|------------|--------------------|
| MAGOH-EIF4A3             | 144700               | 1.23       | 1384         | 0.01       | 0          | 3524726              | 29.9       | 396           | 0          | 20182         | 0.17       | 677876       | 5.75       | 2223        | 0.02       | 6459016            |
| CASC3-EIF4A3             | 124075               | 1.64       | 787          | 0.01       | 0          | 4946036              | 65.48      | 102           | 0          | 4582          | 0.06       | 462939       | 6.13       | 3095        | 0.04       | 1495366            |
| RNPS1-EIF4A3             | 108423               | 1.21       | 879          | 0.01       | 0          | 3215430              | 35.87      | 193           | 0          | 7039          | 0.08       | 1275182      | 14.22      | 3955        | 0.04       | 3415508            |
| MAGOH-CASC3              | 35630                | 0.55       | 936          | 0.01       | 0          | 3663566              | 57.03      | 105           | 0          | 3038          | 0.05       | 163479       | 2.54       | 4305        | 0.07       | 2113232            |
| MAGOH-RNPS1              | 60106                | 0.54       | 1511         | 0.01       | 0          | 5766613              | 51.63      | 133           | 0          | 4938          | 0.04       | 385709       | 3.45       | 4516        | 0.04       | 4292077            |
| CASC3-EIF4A3-XL-A        | 22902                | 0.43       | 1264         | 0.02       | 0          | 3382695              | 63.71      | 322           | 0.01       | 7479          | 0.14       | 140262       | 2.64       | 3892        | 0.07       | 1370243            |
| CASC3-EIF4A3-XL-B        | 98373                | 0.49       | 3261         | 0.02       | 0          | 11708237             | 58.38      | 1866          | 0.01       | 6384          | 0.03       | 1297149      | 6.47       | 10183       | 0.05       | 1362717            |
| RNPS1-EIF4A3-XL-A        | 28638                | 0.37       | 1455         | 0.02       | 0          | 3253080              | 41.5       | 896           | 0.01       | 16125         | 0.21       | 506409       | 6.46       | 4484        | 0.06       | 3352993            |
| RNPS1-EIF4A3-XL-B        | 50751                | 0.22       | 6254         | 0.03       | 0          | 9460234              | 40.37      | 3923          | 0.02       | 13060         | 0.06       | 2295813      | 9.8        | 8177        | 0.03       | 6214673            |
| CASC3-EIF4A3-XL-A (+CHX) | 47903                | 0.32       | 14652        | 0.1        | 0          | 4289703              | 28.44      | 334           | 0          | 7472          | 0.05       | 76118        | 0.5        | 8924        | 0.06       | 9772454            |
| CASC3-EIF4A3-XL-B (+CHX) | 60192                | 0.45       | 6725         | 0.05       | 0          | 4702167              | 35.05      | 243           | 0          | 4686          | 0.03       | 71546        | 0.53       | 6357        | 0.05       | 7962962            |
| RNPS1-EIF4A3-XL-A (+CHX) | 132946               | 0.5        | 2653         | 0.01       | 0          | 12002630             | 45.16      | 1679          | 0.01       | 36309         | 0.14       | 1267031      | 4.77       | 21014       | 0.08       | 10669549           |
| RNPS1-EIF4A3-XL-B (+CHX) | 3478                 | 0.15       | 110          | 0          | 0          | 1526002              | 67.08      | 49            | 0          | 235           | 0.01       | 9165         | 0.4        | 93          | 0          | 614313             |
| RNA-Seq-A                | 507860               | 4.17       | 11319        | 0.09       | 0          | 693781               | 5.7        | 5463          | 0.04       | 183690        | 1.51       | 481999       | 3.96       | 1883466     | 15.46      | 3480574            |
| RNA-Seq-B                | 535924               | 4.26       | 13299        | 0.11       | 0          | 506876               | 4.03       | 6870          | 0.05       | 298611        | 2.37       | 673413       | 5.35       | 1945855     | 15.45      | 3754081            |

**Table C. Genomic read distribution (51% overlap)**

| <i>Library</i>           | <i>Exonic</i> | <i>(%)</i> | <i>RPKM</i> | <i>Intronic</i> | <i>(%)</i> | <i>RPKM</i> | <i>Intergenic</i> | <i>(%)</i> | <i>1 Exon Genes</i> | <i>RPKM</i> | <i>2+ Exon Genes</i> | <i>RPKM</i> |
|--------------------------|---------------|------------|-------------|-----------------|------------|-------------|-------------------|------------|---------------------|-------------|----------------------|-------------|
| MAGOH-EIF4A3             | 4384496.00    | 67.88      | 7.40        | 1797361.00      | 27.83      | 0.19        | 277159.00         | 4.29       | 30122.00            | 1.70        | 4473662.00           | 7.78        |
| CASC3-EIF4A3             | 906277.00     | 60.61      | 6.61        | 504613.00       | 33.75      | 0.23        | 84476.00          | 5.65       | 11554.00            | 2.82        | 924113.00            | 6.94        |
| RNPS1-EIF4A3             | 2162371.00    | 63.31      | 6.90        | 1098461.00      | 32.16      | 0.22        | 154676.00         | 4.53       | 23011.00            | 2.46        | 2209957.00           | 7.27        |
| MAGOH-CASC3              | 1476411.00    | 69.87      | 7.61        | 531464.00       | 25.15      | 0.17        | 105357.00         | 4.99       | 15495.00            | 2.68        | 1505597.00           | 8.00        |
| MAGOH-RNPS1              | 3046675.00    | 70.98      | 7.74        | 1026440.00      | 23.91      | 0.16        | 218962.00         | 5.10       | 30176.00            | 2.57        | 3105684.00           | 8.13        |
| CASC3-EIF4A3-XL-A        | 914747.00     | 66.76      | 7.28        | 379830.00       | 27.72      | 0.19        | 75666.00          | 5.52       | 7480.00             | 1.99        | 936445.00            | 7.68        |
| CASC3-EIF4A3-XL-B        | 1193285.00    | 87.57      | 9.54        | 692445.00       | 50.81      | 0.34        | 523013.00         | 38.38      | 16125.00            | 4.32        | 1231702.00           | 10.15       |
| RNPS1-EIF4A3-XL-A        | 2274827.00    | 67.84      | 7.39        | 908998.00       | 27.11      | 0.18        | 169168.00         | 5.05       | 15559.00            | 1.70        | 2336427.00           | 7.83        |
| RNPS1-EIF4A3-XL-B        | 7357943.00    | 118.40     | 12.90       | 3281206.00      | 52.80      | 0.36        | 4424476.00        | 71.19      | 53784.00            | 3.16        | 7573547.00           | 13.69       |
| CASC3-EIF4A3-XL-A (+CHX) | 7860415.00    | 80.43      | 8.77        | 1741791.00      | 17.82      | 0.12        | 170248.00         | 1.74       | 47235.00            | 1.77        | 8010464.00           | 9.21        |
| CASC3-EIF4A3-XL-B (+CHX) | 6528217.00    | 81.98      | 8.94        | 1331364.00      | 16.72      | 0.11        | 103381.00         | 1.30       | 26773.00            | 1.23        | 6674856.00           | 9.42        |
| RNPS1-EIF4A3-XL-A (+CHX) | 7057878.00    | 66.15      | 7.21        | 3096590.00      | 29.02      | 0.20        | 515081.00         | 4.83       | 46214.00            | 1.58        | 7205508.00           | 7.59        |
| RNPS1-EIF4A3-XL-B (+CHX) | 454507.00     | 73.99      | 8.06        | 117397.00       | 19.11      | 0.13        | 42409.00          | 6.90       | 4588.00             | 2.73        | 463153.00            | 8.47        |
| RNA-Seq-A                | 1059522.00    | 30.44      | 3.32        | 1761478.00      | 50.61      | 0.34        | 659574.00         | 18.95      | 81172.00            | 8.52        | 1064409.00           | 3.44        |
| RNA-Seq-B                | 1080657.00    | 28.79      | 3.14        | 1785669.00      | 47.57      | 0.32        | 887755.00         | 23.65      | 110593.00           | 10.76       | 1072926.00           | 3.21        |

**Table D. Canonical/Non-canonical read classification**

| <i>Library</i>           | <i>Canonical</i> | <i>(%ofExonic)</i> | <i>Non-Canonical</i> | <i>(%ofExonic)</i> | <i>Uncounted</i> | <i>(%ofExonic)</i> |
|--------------------------|------------------|--------------------|----------------------|--------------------|------------------|--------------------|
| MAGOH-EIF4A3             | 1546096.00       | 35.26              | 2722620.00           | 62.10              | 115780.00        | 2.64               |
| CASC3-EIF4A3             | 289135.00        | 31.90              | 579485.00            | 63.94              | 37657.00         | 4.16               |
| RNPS1-EIF4A3             | 811486.00        | 37.53              | 1267130.00           | 58.60              | 83755.00         | 3.87               |
| MAGOH-CASC3              | 476638.00        | 32.28              | 951547.00            | 64.45              | 48226.00         | 3.27               |
| MAGOH-RNPS1              | 898705.00        | 29.50              | 2006039.00           | 65.84              | 141931.00        | 4.66               |
| CASC3-EIF4A3-XL-A        | 326669.00        | 35.71              | 530307.00            | 57.97              | 57771.00         | 6.32               |
| CASC3-EIF4A3-XL-B        | 587174.00        | 49.21              | 543975.00            | 45.59              | 62136.00         | 5.21               |
| RNPS1-EIF4A3-XL-A        | 723741.00        | 31.82              | 1407464.00           | 61.87              | 143622.00        | 6.31               |
| RNPS1-EIF4A3-XL-B        | 2555021.00       | 34.72              | 4178245.00           | 56.79              | 624677.00        | 8.49               |
| CASC3-EIF4A3-XL-A (+CHX) | 2386087.00       | 30.36              | 4692151.00           | 59.69              | 782177.00        | 9.95               |
| CASC3-EIF4A3-XL-B (+CHX) | 3145982.00       | 48.19              | 2672452.00           | 40.94              | 709783.00        | 10.87              |
| RNPS1-EIF4A3-XL-A (+CHX) | 1593969.00       | 22.58              | 4853509.00           | 68.77              | 610400.00        | 8.65               |
| RNPS1-EIF4A3-XL-B (+CHX) | 46447.00         | 10.22              | 358889.00            | 78.96              | 49171.00         | 10.82              |



**Table S3.** List of reagents (siRNA sequences, qRT-PCR primers, antibodies, plasmids)

**siRNAs**

| Gene                             | siRNA sequence                     | Reference  |
|----------------------------------|------------------------------------|------------|
| <i>AllStars Negative Control</i> | <i>Qiagen proprietary sequence</i> |            |
| <i>EIF4A3_187</i>                | CGA GCA AUC AAG CAG AUC AUU        | This Study |
| <i>CASC3_534</i>                 | CCA GCA UAC AUA CCU CGG AUU        | This Study |
| <i>RNPS1_2</i>                   | GCA UCC AGC CGC UCA GGA AUU        | This Study |

**qRT-PCR primers**

| Gene           | Primer (Forward)          | Primer (Reverse)          | Reference           |
|----------------|---------------------------|---------------------------|---------------------|
| <i>GADD45A</i> | GAGCTCCTGCTCTTGGAGAC      | GCAGGATCCTTCCATTGAGA      | This Study          |
| <i>UPP1</i>    | CCAGCCTTGTTTGGAGATGT      | ACATGGCATAGCGGTCAATT      | This Study          |
| <i>ARC</i>     | CTGAGATGCTGGAGCACGTA      | GCCTTGATGGACTTCTTCCA      | This Study          |
| <i>DNAJB2</i>  | TGGCATCTACTACGAGATCC      | GTTTTTGTCTGGGTGCCACT      | This Study          |
| <i>eIF4A2</i>  | TGTGGAGACGGTGACAGATTC     | TTCCTGCTTTACCCACCAGTAC    | This Study          |
| <i>TMEM33</i>  | AGGGTCAAGTCGTGTTCTGATC    | ACCAACTGCTGCTATCGACTC     | This Study          |
| <i>SF3B1</i>   | CACGGCAATGTGGCTTTCTC      | ACTCACCAAGAAGAGGCAGAAC    | This Study          |
| <i>CAPN7</i>   | AATTTCCCCAGAGCGTCTTG      | TTCGTGCCTTTGTCTCCATC      | This Study          |
| <i>TPT1</i>    | CAACGGGAAGGCGAGCTCTC      | GGAAGGAGCGGCAAAGTTTAC     | This Study          |
| <i>C1orf37</i> | TCATCAGCCATGGTCAGTAGG     | TGCAGGTGATGGTTCATGAC      | This Study          |
| <i>SRSF2</i>   | TTGCTGCTCGAATCTCCAAG      | ACTTCTGCTGCCATCACAAC      | Lareau et al., 2007 |
| <i>SRSF4</i>   | CCTCTTAAGAAAATGCTGCGGTCTC | ATCAGCCAAATCAGTTAAAATCTGC | Lareau et al., 2007 |
| <i>SRSF6</i>   | GGATCTGAAGAACGGTCTGTTATGT | TCACTCGCTTTTGGTCCCATTAG   | Lareau et al., 2007 |
| <i>RPL3</i>    | TGGTGGAAAAGGTCCTTAG       | TCAGGAGCAGAGCAGAGTTG      | This Study          |
| <i>RPL12</i>   | CTGGGCCTTAGCTTCTTCAC      | AAGTGGCACCGACTTCACCT      | This Study          |
| <i>ACTB</i>    | CGCGAGAAGATGACCCAGAT      | TCACCGGAGTCCATCACGAT      | This Study          |

**Antibodies**

| Protein | Source                   | Catalog#    |
|---------|--------------------------|-------------|
| CASC3   | Bethyl Laboratories      | A302-472    |
| RNPS1   | Sigma Aldrich            | HPA044014   |
| RNPS1   | Akila Mayeda             |             |
| EIF4A3  | Bethyl Laboratories      | A302-980A   |
| HNRNPA1 | Santa Cruz Biotechnology | SC-32301    |
| ACIN1   | Bethyl Laboratories      | A300-999A   |
| SAP18   | Santa Cruz Biotechnology | SC-25377    |
| RBM8A   | Sigma Aldrich            | Y1253 (4C4) |
| MAGOH   | Santa Cruz Biotechnology | SC-271365   |
| SRSF1   | Santa Cruz Biotechnology | SC-33652    |
| FLAG    | Sigma Aldrich            | F1804       |

## Reagents

| Reagent                            | Source             | Catalog# |
|------------------------------------|--------------------|----------|
| Protein A Dynabeads                | Life Technologies  | 10002D   |
| Protein G Dynabeads                | Life Technologies  | 10003D   |
| FLAG-Agarose Beads                 | Sigma Aldrich      | A2220    |
| FLAG peptide                       | Sigma Aldrich      | F3290    |
| MWCO 7,000 Da Dialysis Column      | Pierce             | 88242    |
| 4X Lammelli SDS load buffer        | Bio-Rad            | 161-0737 |
| 4%–15% Mini-PROTEAN TGX            | Bio-Rad            | 4561086  |
| Trypsin Gold                       | Promega            | V5280    |
| ProteaseMAX™ Surfactant            | Promega            | V2071    |
| TransIT-X2                         | Mirus              | MIR 6003 |
| RNAiMAX                            | Thermo Fisher      | 13778030 |
| JetPrime                           | PolyPlus           | 114-01   |
| oligo-(dT)15 Primer                | Promega            | C1101    |
| Superscript III                    | Invitrogen         | 18080044 |
| Ribonuclease H                     | Promega            | M4281    |
| 2X SYBR Green Master Mix           | Applied Biosystems | 4309155  |
| RNase I                            | Promega            | M4261    |
| Ribo-Zero rRNA Removal Kit (H/M/R) | Illumina           | MRZH116  |

## Plasmids

| Plasmid                    | Reference            |
|----------------------------|----------------------|
| pc $\beta$ wt $\beta$      | Lykke-Andersen, 2000 |
| pc $\beta$ 39 $\beta$      | Lykke-Andersen, 2000 |
| pcTET2- $\beta$ wt $\beta$ | Singh et al., 2007   |
| pcTET2- $\beta$ 39 $\beta$ | Singh et al., 2007   |
| pc $\beta$ wtGAP3UAC       | Lykke-Andersen, 2000 |
| pcDNA3                     | Singh et al., 2012   |
| pcDNA3 YFP                 | This study           |
| pcDNA3 FLAG                | Singh et al., 2012   |
| pcDNA3 FLAG-EIF4AIII       | Singh et al., 2012   |
| pcDNA3 FLAG-EIF4AIII YRAA  | This study           |
| pcDNA3 FLAG-MAGOH          | Singh et al., 2012   |
| pcDNA3 FLAG-RNPS1          | This study           |
| pcDNA3 FLAG-CASC3          | This study           |
| pcDNA3 FLAG-HNRNPA1        | This study           |
| pcDNA5 FLAG-MAGOH          | Singh et al., 2012   |
| pcDNA5 FLAG-RNPS1          | This study           |
| pcDNA5 FLAG-CASC3          | This study           |
